# Supplementary material
Source: PubMed Central journal article supplement (PMC3221838)
Supplement: NIHMS330096-supplement-1.pdf [file NIHMS330096-supplement-1.pdf]

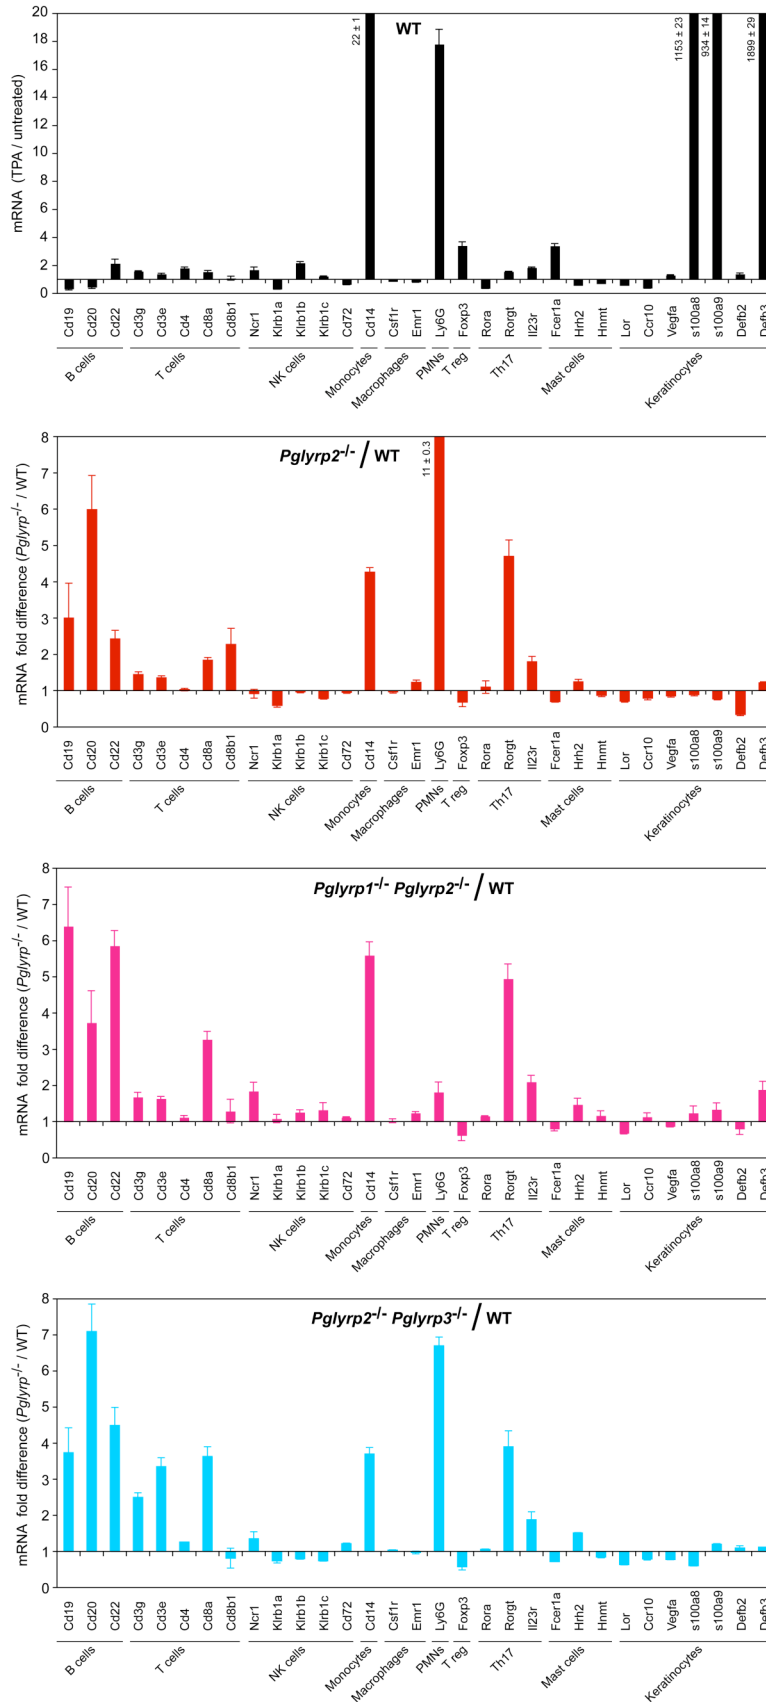

**Supplemental Figure 1. TPA-treated *Pglyrp2*<sup>-/-</sup> mice have increased PMNs, monocytes, B cells, and Th17 cells in the affected skin.** Expression of a panel of marker genes characteristic of various inflammatory cell types in the ears of mice on day 9 after application of TPA to the ears on days 0, 2, 4, 6, and 8 measured by qRT-PCR is shown. For WT mice (top panel), the ratio of the amount of mRNA in TPA-treated to untreated mice for each gene (fold induction by TPA) is shown; for *Pglyrp2*<sup>-/-</sup> mice, the results are the ratios of fold induction of each gene by TPA in *Pglyrp2*<sup>-/-</sup> mice to fold induction of each gene by TPA in WT mice (which represents the fold difference in the response to TPA in *Pglyrp2*<sup>-/-</sup> versus WT mice). The results are means ± SEM of 3 arrays from 4–5 mice/group and are shown as heat maps in Fig. 4A in the main article.

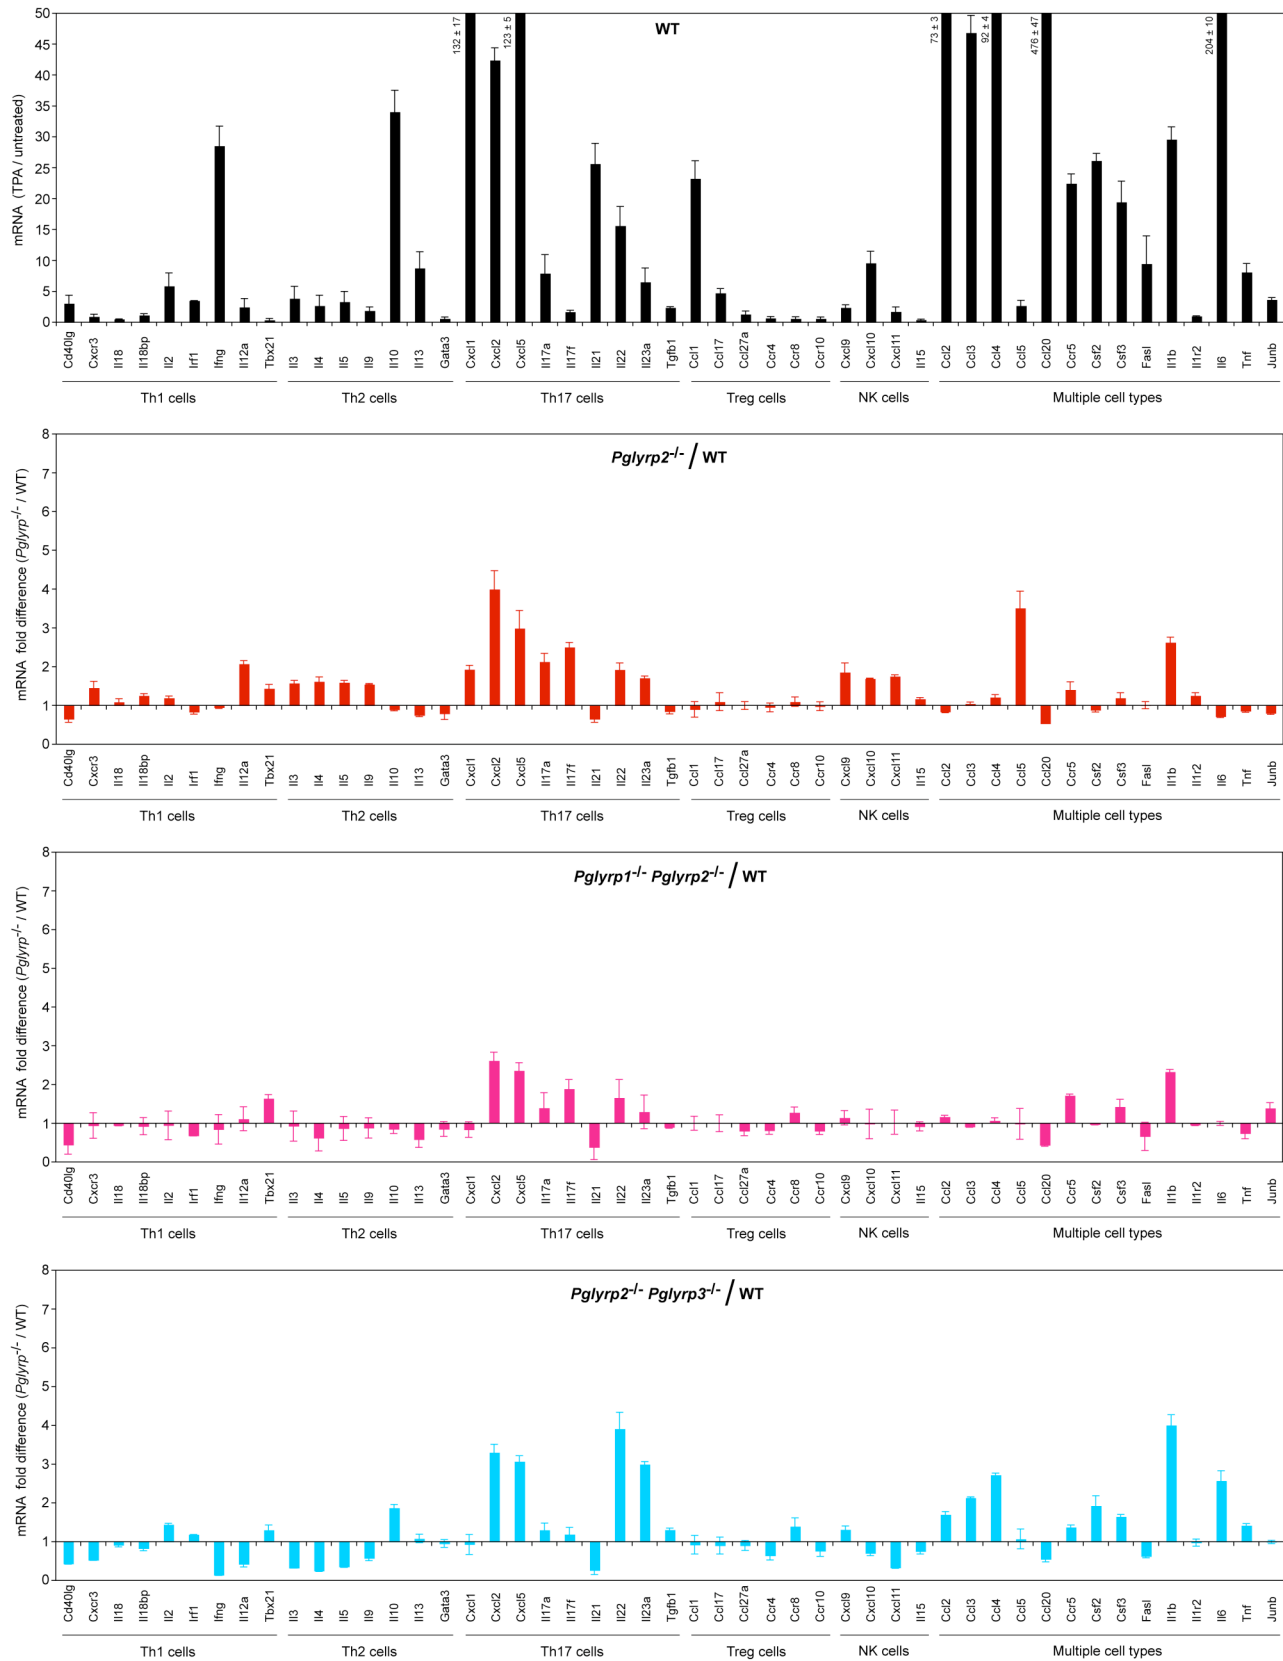

**Supplemental Figure 2. Multiple inflammatory and immune genes are induced early in TPA-treated skin.** Expression of a panel of cytokines, chemokines, and other marker genes characteristic of Th1, Th2, Th17, Treg, NK, and other cell types in the ears of mice 6 hrs after a single application of TPA to the ears measured by qRT-PCR. For WT mice (top panel), the ratio of the amount of mRNA in TPA-treated to untreated mice for each gene (fold induction by TPA) is shown; for *Pglyrp2<sup>-/-</sup>* mice the results are the ratios of fold induction of each gene by TPA in *Pglyrp2<sup>-/-</sup>* mice to fold induction of each gene by TPA in WT mice (which represents the fold difference in the response to TPA in *Pglyrp<sup>-/-</sup>* versus WT mice). The results are means ± SEM of 3 arrays from 4–5 mice/group and are shown as heat maps in Fig. 4B in the main article.

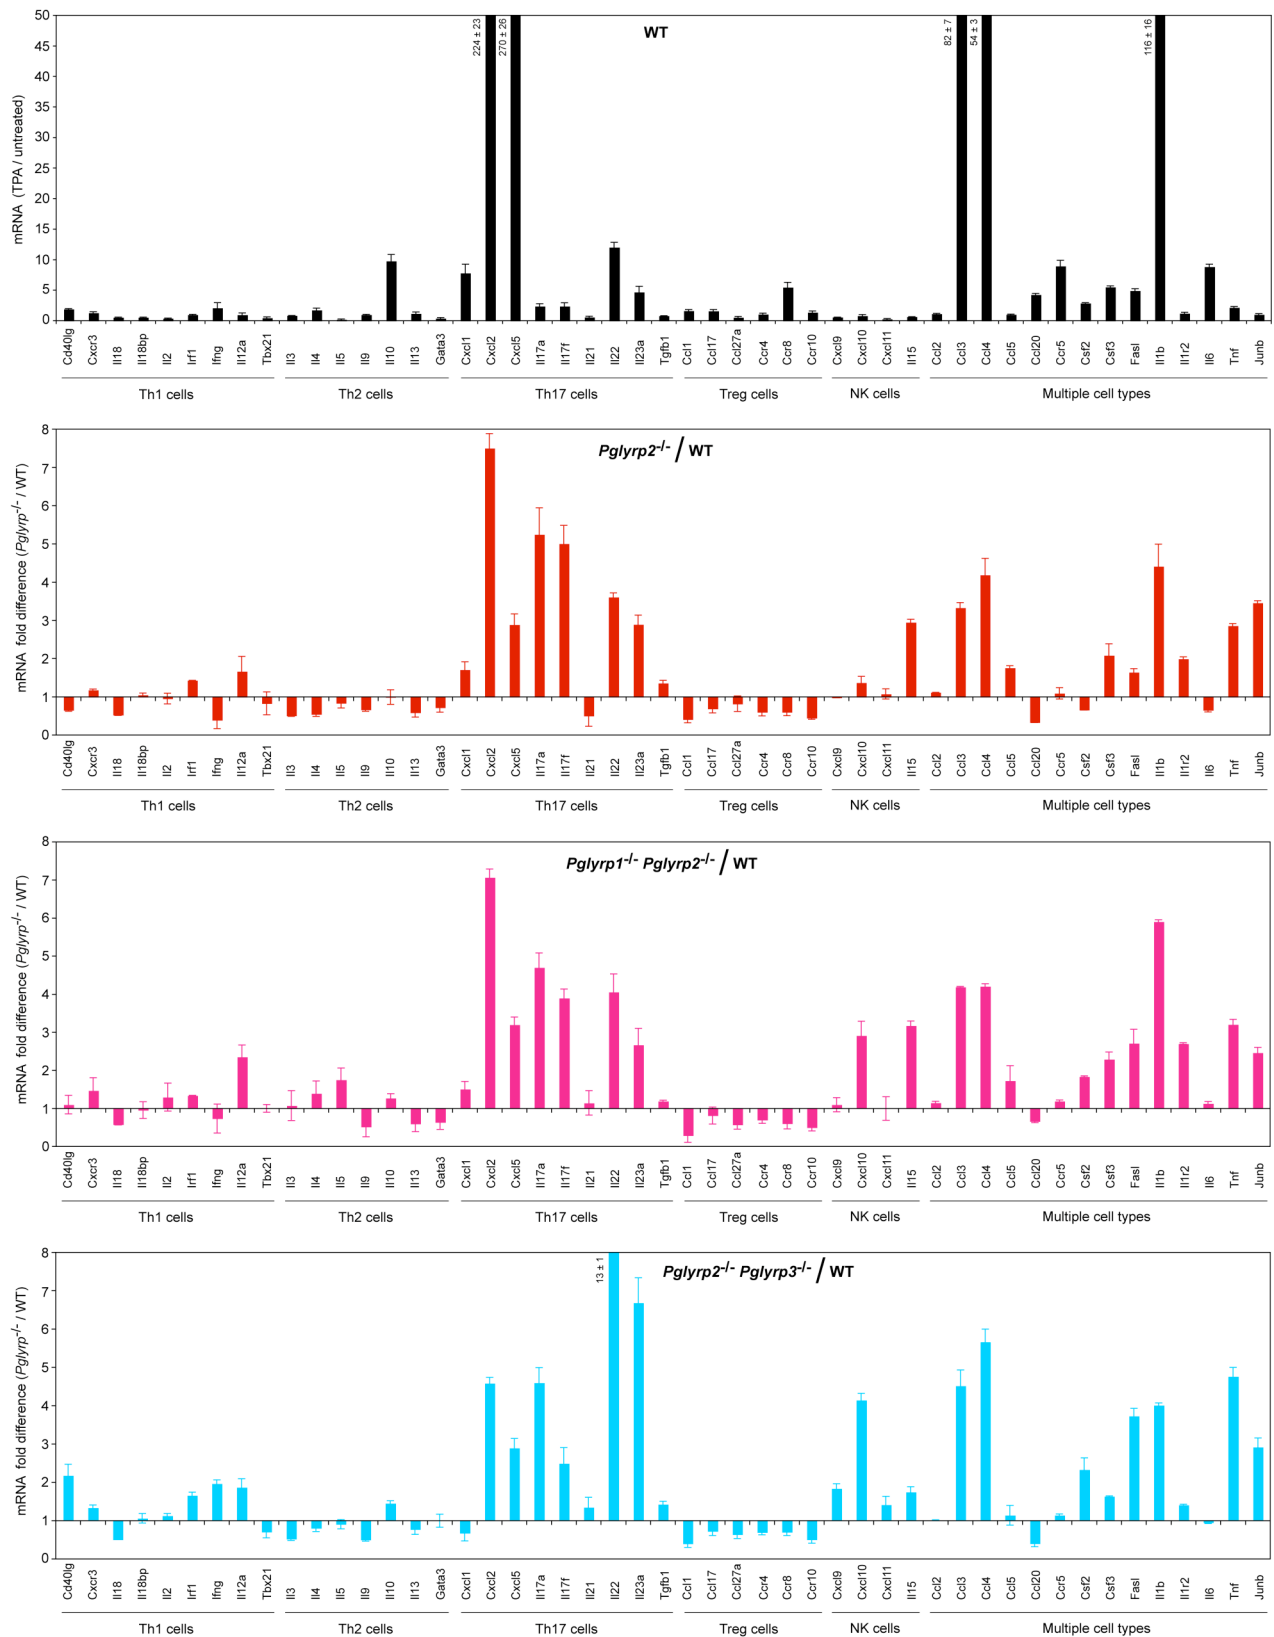

**Supplemental Figure 3. Th17 gene expression profile is preferentially induced by TPA in the affected skin of *Pglyrp2<sup>-/-</sup>* mice.** Expression of a panel of cytokines, chemokines, and other marker genes characteristic of Th1, Th2, Th17, Treg, NK, and other cell types in the ears of mice on day 9 after application of TPA to the ears on days 0, 2, 4, 6, and 8 shows higher induction of several Th17 marker genes in *Pglyrp2<sup>-/-</sup>* mice compared to WT mice (in addition to genes characteristic of many cell types) measured by qRT-PCR. For WT mice (top panel), the ratio of the amount of mRNA in TPA-treated to untreated mice for each gene (fold induction by TPA) is shown; for *Pglyrp2<sup>-/-</sup>* mice, the results are the ratios of fold induction of each gene by TPA in *Pglyrp2<sup>-/-</sup>* mice to fold induction of each gene by TPA in WT mice (which represents the fold difference in the response to TPA in *Pglyrp2<sup>-/-</sup>* versus WT mice). The results are means ± SEM of 3–4 arrays from 4–5 mice/group and are shown as heat maps in Fig. 4B in the main article.

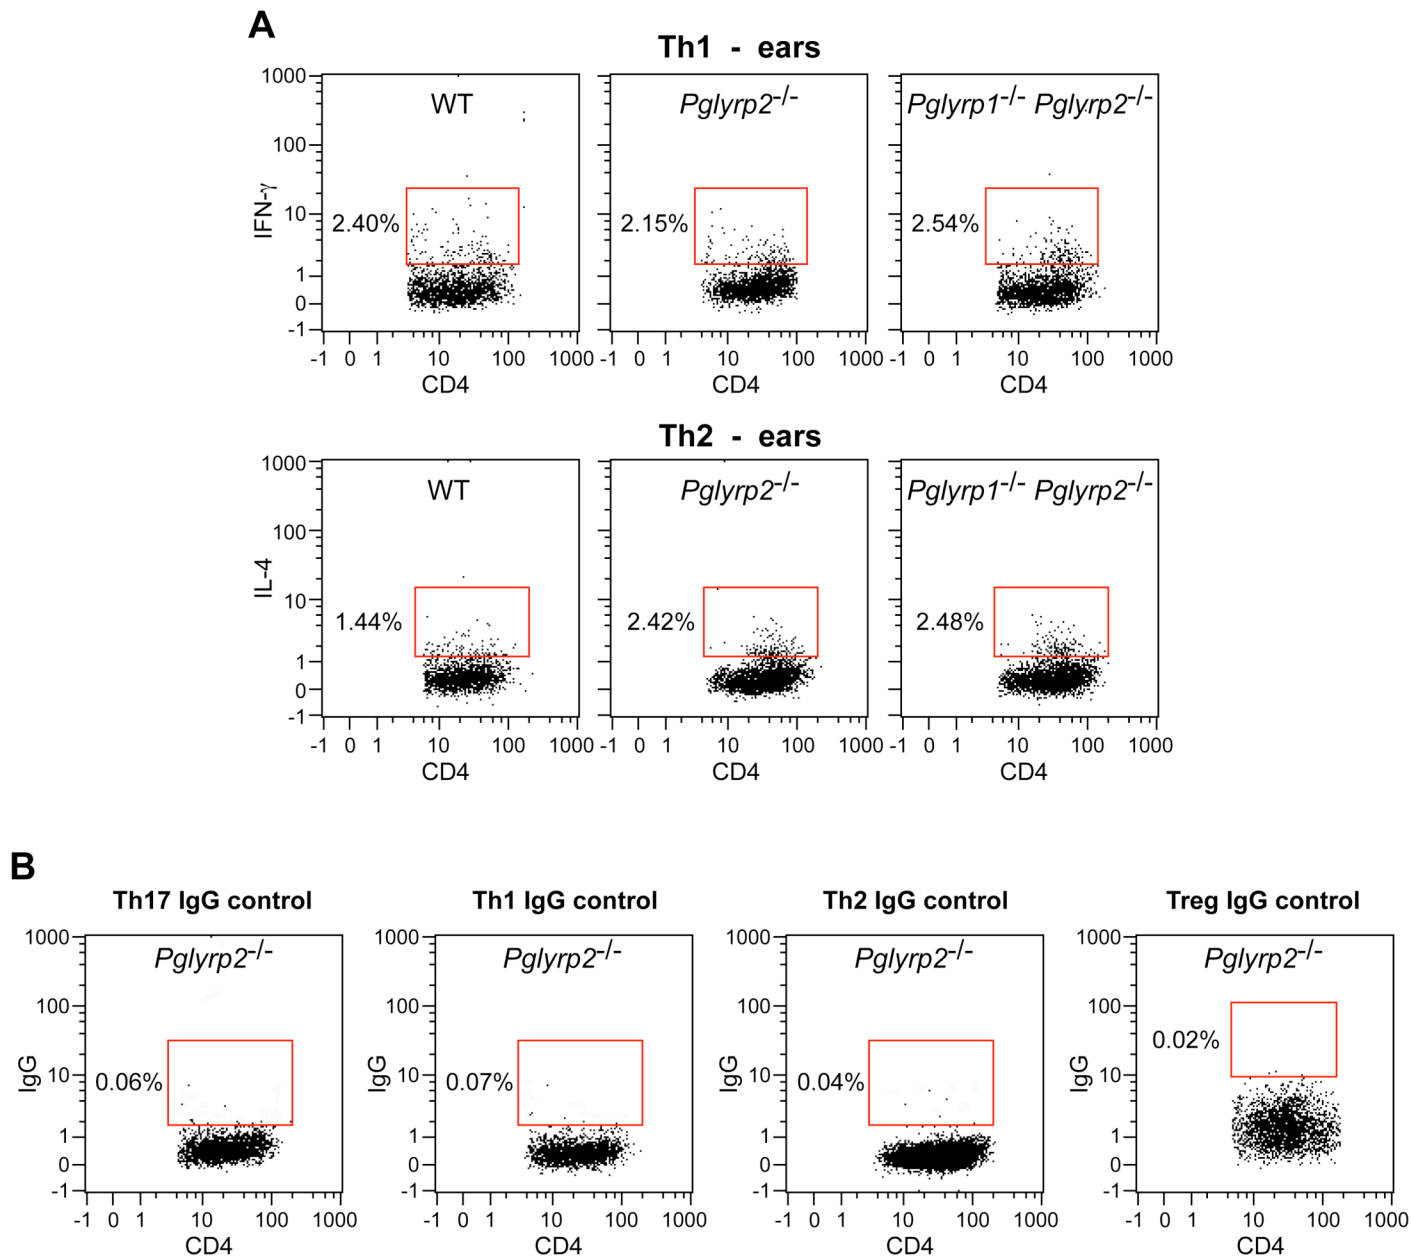

**Supplemental Figure 4. A.** Representative dot plots of Th1 and T2 cells in the ears of WT, *Pglyrp2<sup>-/-</sup>* and *Pglyrp1<sup>-/-</sup>Pglyrp2<sup>-/-</sup>* mice on day 9 after application of TPA to the ears on days 0, 2, 4, 6, and 8 measured by flow cytometry. The means  $\pm$  SEM of 5–9 mice/group are shown in Fig. 5A in the main article. **B.** Representative dot plots with ear CD4<sup>+</sup> lymphocytes from *Pglyrp2<sup>-/-</sup>* mice after 9 days of treatment with TPA as above in A, stained with isotype control IgG for IL-17 Ab (Th17 cells), IFN- $\gamma$  Ab (Th1 cells), IL-4 Ab (Th2 cells), or Foxp3 Ab (Treg cells).
